# Supplementary material for: Expression and prognosis analyses of CASP1 in acute myeloid leukemia
Source: publisher site journal article supplement (doi:10.18632/aging.203028), 2021-05-17
Supplement: Supplementary file [file aging-v13i10-203028-supplementary-material-SD2.pdf]

## SUPPLEMENTARY TABLES

Supplementary Table 1. miRNA enrichment of CASP1 co-expressed genes.

| Geneset                           | Enrichment score | Normalized enrichment score | pvalue   | FDR      | Size | Leading EdgeNum |
|-----------------------------------|------------------|-----------------------------|----------|----------|------|-----------------|
| CAGTCAC,MIR-134                   | -0.5356147       | -1.5057118                  | 0.012397 | 0.307969 | 46   | 15              |
| GGGATGC,MIR-324-5P                | -0.5395772       | -1.5411925                  | 0.004405 | 0.308328 | 46   | 13              |
| CGCTGCT,MIR-503                   | -0.5996193       | -1.4712781                  | 0.041667 | 0.322831 | 22   | 13              |
| TGCACGA,MIR-517A,MIR-517C         | -0.6180279       | -1.4177299                  | 0.044898 | 0.438749 | 16   | 3               |
| TCTAGAG,MIR-517                   | -0.4748998       | -1.3425616                  | 0.075556 | 0.535813 | 45   | 12              |
| GGTAACC,MIR-409-5P                | -0.5314163       | -1.3730561                  | 0.069767 | 0.547899 | 27   | 5               |
| GGCCAGT,MIR-193A,MIR-193B         | -0.4799717       | -1.5475977                  | 0.004926 | 0.575831 | 83   | 19              |
| AGTCAGC,MIR-345                   | -0.4490602       | -1.3434165                  | 0.06278  | 0.608981 | 54   | 17              |
| GTGGTGA,MIR-197                   | -0.379348        | -1.1863224                  | 0.156951 | 0.629742 | 67   | 18              |
| CCTGCTG,MIR-214                   | -0.3322438       | -1.1932098                  | 0.055249 | 0.629751 | 220  | 44              |
| CAGCCTC,MIR-485-5P                | -0.3823391       | -1.2927548                  | 0.028846 | 0.639001 | 131  | 35              |
| ATGTTTC,MIR-494                   | -0.3411439       | -1.1966772                  | 0.089474 | 0.646199 | 141  | 36              |
| GGCGGCA,MIR-371                   | -0.7508409       | -1.3047399                  | 0.136531 | 0.649839 | 5    | 3               |
| CAGGGTC,MIR-504                   | -0.3825697       | -1.1988028                  | 0.116279 | 0.671615 | 78   | 21              |
| AGGGCCA,MIR-328                   | -0.4041804       | -1.2586383                  | 0.09375  | 0.684516 | 73   | 24              |
| GTGTCAA,MIR-514                   | -0.4130576       | -1.2703542                  | 0.093617 | 0.68502  | 59   | 16              |
| CCCAGAG,MIR-326                   | -0.3471427       | -1.2023533                  | 0.09596  | 0.690066 | 141  | 25              |
| TCCCCAC,MIR-491                   | -0.4121849       | -1.2101717                  | 0.132159 | 0.692994 | 55   | 15              |
| CAGCACT,MIR-512-3P                | -0.3292829       | -1.135226                   | 0.15311  | 0.700912 | 143  | 43              |
| TCGATGG,MIR-213                   | -0.6772519       | -1.1432002                  | 0.310714 | 0.712765 | 5    | 4               |
| AATGGAG,MIR-136                   | -0.3630656       | -1.13698                    | 0.181818 | 0.718277 | 74   | 18              |
| GTTTGTT,MIR-495                   | -0.3044444       | -1.1160896                  | 0.147541 | 0.719442 | 235  | 69              |
| AGGAGTG,MIR-483                   | -0.4095191       | -1.2127934                  | 0.120773 | 0.720192 | 61   | 16              |
| CAGCAGG,MIR-370                   | -0.3218814       | -1.1096571                  | 0.176768 | 0.722945 | 137  | 17              |
| ACAGGGT,MIR-10A,MIR-10B           | -0.3334561       | -1.1202692                  | 0.190217 | 0.724158 | 119  | 20              |
| AAGCCAT,MIR-135A,MIR-135B         | 0.33712366       | 1.19216267                  | 0.065672 | 0.818531 | 310  | 43              |
| GTGACTT,MIR-224                   | 0.36301753       | 1.19240037                  | 0.130872 | 0.857659 | 150  | 31              |
| CTTTGCA,MIR-527                   | 0.32108688       | 1.082235                    | 0.254386 | 0.86316  | 221  | 29              |
| ATTCTTT,MIR-186                   | 0.31759521       | 1.09460462                  | 0.248387 | 0.86323  | 251  | 49              |
| GTCTACC,MIR-379                   | 0.51560807       | 1.19760904                  | 0.206349 | 0.871802 | 20   | 3               |
| CTCCAAG,MIR-432                   | 0.3607626        | 1.06810144                  | 0.29588  | 0.874074 | 74   | 16              |
| GGATCCG,MIR-127                   | 0.58680985       | 1.21240622                  | 0.231441 | 0.875448 | 10   | 3               |
| AATGTGA,MIR-23A,MIR-23B           | 0.30464776       | 1.08335814                  | 0.25731  | 0.878253 | 388  | 64              |
| TAATAAT,MIR-126                   | 0.32201754       | 1.08721064                  | 0.269841 | 0.878776 | 207  | 34              |
| TTTGCAG,MIR-518A-2                | 0.32615264       | 1.0958745                   | 0.231013 | 0.879395 | 193  | 33              |
| ATGTTAA,MIR-302C                  | 0.35198092       | 1.20279444                  | 0.09009  | 0.887306 | 228  | 35              |
| GTGCCAA,MIR-96                    | 0.30565774       | 1.06837271                  | 0.29582  | 0.892419 | 283  | 53              |
| TACTTGA,MIR-26A,MIR-26B           | 0.31273251       | 1.09627075                  | 0.215873 | 0.901719 | 285  | 55              |
| CTCAGGG,MIR-125B,MIR-125A         | 0.34406849       | 1.21625446                  | 0.058282 | 0.904954 | 303  | 89              |
| TCTGGAC,MIR-198                   | 0.33218434       | 1.0140016                   | 0.409894 | 0.906819 | 82   | 16              |
| ACCAAAG,MIR-9                     | 0.29584667       | 1.0691252                   | 0.240331 | 0.910421 | 458  | 57              |
| CAGTATT,MIR-200B,MIR-200C,MIR-429 | 0.29035348       | 1.05676528                  | 0.261838 | 0.912723 | 440  | 69              |
| CTGAGCC,MIR-24                    | 0.29625819       | 1.00895049                  | 0.460064 | 0.913255 | 219  | 31              |

|                                              |            |            |          |          |     |     |
|----------------------------------------------|------------|------------|----------|----------|-----|-----|
| GTGCAAT,MIR-25,MIR-32,MIR-92,MIR-363,MIR-367 | 0.28211347 | 0.99537175 | 0.461538 | 0.915301 | 294 | 50  |
| GTGCCTT,MIR-506                              | 0.31351677 | 1.15712834 | 0.060526 | 0.917579 | 674 | 144 |
| TTTTGAG,MIR-373                              | 0.32583634 | 1.1026909  | 0.233846 | 0.918391 | 210 | 28  |
| AGCATTA,MIR-155                              | 0.35282527 | 1.11720312 | 0.244068 | 0.920096 | 128 | 29  |
| AAGCACT,MIR-520F                             | 0.30106978 | 1.01432611 | 0.422442 | 0.921389 | 219 | 44  |
| TACAATC,MIR-508                              | 0.41788572 | 1.1689215  | 0.234848 | 0.922923 | 57  | 14  |
| ATGCAGT,MIR-217                              | 0.32340869 | 0.9970131  | 0.468852 | 0.92301  | 103 | 14  |

---

**Supplementary Table 2. Transcription factor enrichment of CASP1 co-expressed genes.**

| Geneset                 | Enrichment score | Normalized enrichment score | pvalue   | FDR      | Size | Leading EdgeNum |
|-------------------------|------------------|-----------------------------|----------|----------|------|-----------------|
| V\$PEA3_Q6              | 0.57396322       | 1.96059442                  | 0        | 0        | 240  | 64              |
| V\$E2F_01               | -0.5999168       | -1.8352204                  | 0        | 0.002347 | 64   | 35              |
| V\$PU1_Q6               | 0.5411158        | 1.81098492                  | 0        | 0.003574 | 208  | 63              |
| V\$SRF_01               | 0.65959571       | 1.80023909                  | 0        | 0.003574 | 47   | 16              |
| V\$ELF1_Q6              | 0.55037567       | 1.86720217                  | 0        | 0.004468 | 220  | 62              |
| V\$IRF_Q6               | 0.53577782       | 1.8177585                   | 0        | 0.004765 | 228  | 84              |
| V\$ISRE_01              | 0.50728611       | 1.74621947                  | 0        | 0.005659 | 233  | 76              |
| RYTTCCTG_V\$ETS2_B      | 0.45066767       | 1.72071227                  | 0        | 0.007914 | 1002 | 222             |
| V\$TEL2_Q6              | 0.49657672       | 1.70003045                  | 0        | 0.010276 | 220  | 54              |
| STTTCRNTTT_V\$IRF_Q6    | 0.51339992       | 1.69480119                  | 0        | 0.010722 | 175  | 48              |
| RGAGGAARY_V\$PU1_Q6     | 0.46921073       | 1.67433248                  | 0        | 0.011765 | 459  | 94              |
| YNTTTNNNANGCARM_UNKNOWN | 0.58236407       | 1.68595935                  | 0        | 0.011795 | 67   | 10              |
| V\$IRF1_Q6              | 0.49473696       | 1.67451422                  | 0        | 0.012834 | 233  | 55              |
| V\$E2F1_Q6_01           | -0.4839508       | -1.7537136                  | 0        | 0.014084 | 218  | 91              |
| V\$ETS2_B               | 0.47904718       | 1.65316635                  | 0        | 0.014159 | 259  | 55              |
| V\$ICSBP_Q6             | 0.47956267       | 1.62511362                  | 0        | 0.019658 | 230  | 62              |
| V\$E2F_Q6_01            | -0.4632908       | -1.6752839                  | 0        | 0.022534 | 218  | 66              |
| V\$E2F1_Q4_01           | -0.4690197       | -1.6876398                  | 0        | 0.022887 | 210  | 77              |
| V\$CEBPB_01             | 0.47218528       | 1.60792237                  | 0        | 0.02347  | 240  | 54              |
| V\$ETS_Q4               | 0.46520902       | 1.59344716                  | 0        | 0.028369 | 236  | 47              |
| V\$CEBPB_02             | 0.45616718       | 1.58251459                  | 0        | 0.028791 | 235  | 50              |
| V\$E2F_Q3_01            | -0.4701195       | -1.6921283                  | 0        | 0.02895  | 215  | 78              |
| V\$AP1_Q4_01            | 0.46035093       | 1.58408106                  | 0        | 0.030065 | 243  | 58              |
| ACTAYRNNNCCCR_UNKNOWN   | -0.4214518       | -1.6043698                  | 0        | 0.035503 | 408  | 121             |
| V\$CEBP_Q2_01           | 0.45789441       | 1.56208554                  | 0        | 0.035647 | 247  | 51              |
| V\$E2F_03               | -0.449346        | -1.6225953                  | 0        | 0.038731 | 224  | 68              |
| V\$E2F_Q4_01            | -0.4471581       | -1.6057194                  | 0        | 0.039905 | 215  | 66              |
| V\$IRF7_01              | 0.45553697       | 1.54190145                  | 0        | 0.040336 | 231  | 49              |
| SGCGSSAAA_V\$E2F1DP2_01 | -0.4473325       | -1.5812434                  | 0        | 0.040426 | 155  | 71              |
| V\$MAF_Q6               | 0.45346044       | 1.54239303                  | 0        | 0.042174 | 239  | 50              |
| V\$E2F1_Q6              | -0.4312803       | -1.5668496                  | 0        | 0.043191 | 213  | 77              |
| V\$E2F1DP1_01           | -0.4161494       | -1.5071466                  | 0        | 0.043426 | 218  | 82              |
| V\$E2F1DP2_01           | -0.4161494       | -1.5071466                  | 0        | 0.043426 | 218  | 82              |
| V\$E2F4DP2_01           | -0.4161494       | -1.5071466                  | 0        | 0.043426 | 218  | 82              |
| V\$E2F_Q6               | -0.4276823       | -1.5559191                  | 0        | 0.043532 | 211  | 85              |
| V\$MYCMAX_01            | -0.4205049       | -1.5483221                  | 0        | 0.043621 | 236  | 66              |
| V\$SRF_C                | 0.44992831       | 1.53071115                  | 0        | 0.044189 | 197  | 41              |
| V\$E2F_Q4               | -0.4241098       | -1.5337775                  | 0        | 0.045683 | 212  | 87              |
| WCTCNATGGY_UNKNOWN      | -0.4877758       | -1.5119369                  | 0.004545 | 0.047085 | 71   | 28              |
| GGAMTNNNNNTCCY_UNKNOWN  | -0.4533504       | -1.4950502                  | 0.009009 | 0.048176 | 104  | 36              |
| V\$E2F_02               | -0.4157139       | -1.513259                   | 0        | 0.049441 | 218  | 82              |
| V\$E2F1DP1RB_01         | -0.418954        | -1.5160793                  | 0        | 0.050702 | 209  | 76              |
| V\$ZF5_B                | -0.4153122       | -1.5217067                  | 0        | 0.050971 | 225  | 52              |
| V\$NMYC_01              | -0.4036861       | -1.4760014                  | 0        | 0.056656 | 252  | 69              |
| MCAATNNNNNGCG_UNKNOWN   | -0.4717761       | -1.4586272                  | 0.009569 | 0.062596 | 76   | 24              |
| V\$MYCMAX_B             | -0.3940211       | -1.4621286                  | 0        | 0.063072 | 245  | 89              |
| V\$AML1_01              | 0.43094581       | 1.48271613                  | 0.003155 | 0.069993 | 246  | 55              |

|                  |            |            |          |          |      |     |
|------------------|------------|------------|----------|----------|------|-----|
| V\$AML1_Q6       | 0.43094581 | 1.48271613 | 0.003155 | 0.069993 | 246  | 55  |
| V\$E2F4DP1_01    | -0.3957904 | -1.4443529 | 0        | 0.070608 | 219  | 84  |
| TGANTCA_V\$AP1_C | 0.38701162 | 1.47565026 | 0        | 0.073769 | 1035 | 221 |

---
